# Supplementary material for: Mitigating NaCl stress in Vigna radiata L. cultivars using Bacillus pseudomycoides
Source: PeerJ. 2024 Jun 4;12:e17465. doi: 10.7717/peerj.17465 (PMC11160433; doi:10.7717/peerj.17465)
Supplement: Supplemental Information 4 [file peerj-12-17465-s004.xlsx]

## Sheet: M. Harvest(Shoot Length, W.O.B)
Treatments	Inqelab mung(V1)	NIFA-19 (V2)	NIFA-17 (V3)	Sona Mung (V4)	Ramzan (V5)
T0	44.7	38.4	32.8	28.3	24.1
	44.9	38.8	32.5	28.4	24.8
	43.8	38.3	32.1	28.8	24.9
T1	32.7	28.1	24.7	20.7	17.8
	32.9	28.9	25.5	20.3	17.7
	31.7	27.8	24.1	20.8	17.3
T2	24.9	21.4	18.1	13.8	12.1
	24.7	22.1	18.8	13.4	12.3
	24.1	21.8	18.7	13.9	12.8
T3	19.8	14.8	11.1	9.7	7.7
	19.2	14.7	11.3	9.4	7.2
	18.8	15.2	11.7	9.2	7.9
T4	11.9	9.9	6.4	5.8	4.4
	11.7	9.2	6.1	5.3	4.1
	11.9	9.5	6.8	5.2	4.3
T5	8.9	7.8	4.9	3.9	2.1
	8.2	7.4	4.4	3.3	2.2
	8.1	7.1	4.1	3.1	2.8

## Sheet: M.Harvest(Shoot Length, W.B)
Treatments	Inqelab mung(V1)	NIFA-19 (V2)	NIFA-17 (V3)	Sona Mung (V4)	Ramzan (V5)
T0B	54.4	50.1	48.9	37.7	31.3
	54.8	50.8	48.4	37.3	31.8
	54.9	50.4	48.3	37.8	31.9
T1B	48.8	44.2	37.8	29.1	25.5
	48.2	44.8	37.4	29.4	25.8
	48.9	44.9	37.1	29.7	25.2
T2B	37.8	35.5	29.8	23.3	19.2
	37.2	35.2	29.4	23.7	19.3
	37.9	35.1	29.1	23.9	19.8
T3B	31.8	24.8	21.1	17.7	14.7
	31.3	24.5	21.8	17.9	14.3
	31.9	24.2	21.9	17.4	14.8
T4B	27.2	22.9	18.7	14.4	9.9
	27.9	22.4	18.4	14.7	9.4
	27.3	22.1	18.2	14.9	9.1
T5B	19.9	17.8	15.5	10.9	7.7
	19.2	17.9	15.2	10.4	7.2
	19.4	17.4	15.8	10.3	7.4

## Sheet: M.Harvest(Root Length, W.O.B)
Treatments	Inqelab mung(V1)	NIFA-19 (V2)	NIFA-17 (V3)	Sona Mung (V4)	Ramzan (V5)
T0	6.8	5.7	4.8	3.3	2.4
	6.4	5.8	4.4	3.7	2.8
	6.2	5.4	4.3	3.2	2.7
	6.46667	5.63333	4.5	3.4	2.63333
T1	5.8	4.8	3.8	2.9	1.7
	5.3	4.1	3.4	2.4	1.4
	5.7	4.7	3.3	2.3	1.8
	5.6	4.53333	3.5	2.53333	1.63333
T2	4.9	3.3	2.1	1.7	0.94
	4.8	3.9	2.3	1.4	0.97
	4.4	3.2	2.7	1.8	0.98
	4.7	3.46667	2.36667	1.63333	0.963333
T3	3.8	2.1	1.7	0.94	0.87
	3.3	2.2	1.4	0.92	0.88
	3.7	2.7	1.1	0.97	0.84
	3.6	2.33333	1.4	0.943333	0.863333
T4	2.7	1.9	0.98	0.84	0.74
	2.9	1.1	0.97	0.81	0.78
	2.4	1.4	0.94	0.87	0.77
	2.66667	1.46667	0.963333	0.84	0.763333
T5	1.8	0.98	0.87	0.77	0.68
	1.9	0.97	0.84	0.74	0.63
	1.4	0.94	0.83	0.72	0.64
	1.7	0.963333	0.846667	0.743333	0.65
	INQELAB	NIFA-19	NIFA-17	Sona Mung	Ramzan

## Sheet: M.Harvest(Root Length, W.B)
Treatments	Inqelab mung(V1)	NIFA-19 (V2)	NIFA-17 (V3)	Sona Mung (V4)	Ramzan (V5)
T0B	8.9	7.7	6.8	5.4	4.7
	8.8	7.5	6.6	5.8	4.4
	8.5	7.3	6.4	5.2	4.3
T1B	7.5	6.8	5.3	4.4	3.4
	7.8	6.9	5.5	4.7	3.7
	7.4	6.4	5.7	4.2	3.8
T2B	6.8	5.5	4.4	3.3	2.4
	6.9	5.4	4.7	3.8	2.7
	6.4	5.7	4.8	3.9	2.8
T3B	5.4	4.4	3.8	2.3	1.7
	5.8	4.2	3.3	2.7	1.4
	5.1	4.8	3.7	2.9	1.8
T4B	4.8	3.8	2.7	1.7	0.94
	4.4	3.3	2.4	1.4	0.92
	4.3	3.1	2.9	1.8	0.97
T5B	3.8	2.4	1.7	0.97	0.84
	3.4	2.8	1.4	0.94	0.87
	3.9	2.7	1.8	0.92	0.83

## Sheet: M.Harvest,Shoot(F.W,W.O.B)
Treatments	Inqelab mung(V1)	NIFA-19 (V2)	NIFA-17 (V3)	Sona Mung (V4)	Ramzan (V5)
T0	6.6	5.7	4.8	3.3	2.6
	6.3	5.5	4.2	3.1	2.8
	6.7	5.3	4.1	3.7	2.7
T1	5.5	4.7	3.7	2.77	2.11
	5.8	4.4	3.3	2.91	2.08
	5.3	4.1	3.9	2.84	1.97
T2	4.7	3.3	2.7	2.21	1.67
	4.4	3.7	2.4	2.14	1.54
	4.2	3.9	2.9	2.05	1.73
T3	3.7	2.4	1.7	1.67	1.08
	3.9	2.7	1.8	1.53	1.02
	3.3	2.1	1.9	1.51	1.01
T4	2.8	1.7	1.72	1.26	0.97
	2.4	1.9	1.55	1.21	0.83
	2.7	1.9	1.53	1.16	0.81
T5	1.98	1.85	1.32	1.16	0.71
	1.93	1.74	1.47	1.11	0.62
	1.87	1.72	1.41	1.08	0.54

## Sheet: M.Harvest,Shoot(F.W,W.B)
Treatments	Inqelab mung(V1)	NIFA-19 (V2)	NIFA-17 (V3)	Sona Mung (V4)	Ramzan (V5)
T0B	8.83	8.03	7.34	6.92	6.14
	8.75	8.1	7.14	6.84	6.01
	8.67	7.67	7.06	6.68	5.93
T1B	8.12	7.23	6.83	6.04	5.23
	7.89	7.12	6.46	6.08	5.44
	7.92	6.92	6.24	6.36	5.06
T2B	7.21	6.22	6.03	5.34	4.83
	7.13	6.13	5.83	5.72	4.74
	6.95	6.02	5.94	5.64	4.67
T3B	6.23	5.45	5.34	4.87	4.13
	6.47	5.78	5.12	5.03	4.07
	6.02	5.12	5.04	4.92	3.94
T4B	5.92	4.92	4.83	4.46	3.56
	5.52	4.73	4.92	4.27	3.21
	5.31	4.57	4.71	4.03	3.34
T5B	4.73	4.12	4.15	3.58	3.07
	5.06	4.25	3.87	3.27	2.93
	4.82	4.03	3.97	3.75	2.78

## Sheet: M.Harvest,Root(F.W,WO.B)
Treatments	Inqelab mung(V1)	NIFA-19 (V2)	NIFA-17 (V3)	Sona Mung (V4)	Ramzan (V5)
T0B	2.4	2.1	1.97	1.82	1.62
	2.4	2	1.91	1.74	1.53
	2.3	2	1.86	1.68	1.46
T1B	2.1	1.85	1.81	1.52	1.37
	2	1.94	1.74	1.41	1.14
	2	1.76	1.68	1.35	1.23
T2B	1.98	1.62	1.61	1.26	1.05
	1.82	1.71	1.54	1.2	0.93
	1.74	1.65	1.45	1.14	0.86
T3B	1.71	1.61	1.41	0.93	0.77
	1.63	1.45	1.35	1.02	0.58
	1.58	1.51	1.3	0.97	0.64
T4B	1.56	1.31	1.25	0.82	0.33
	1.44	1.28	1.18	0.74	0.42
	1.32	1.36	1.13	0.65	0.34
T5B	1.3	1.21	1.11	0.52	0.12
	1.22	1.14	1.06	0.44	0.24
	1.16	1.12	1.02	0.37	0.17

## Sheet: M.Harvest,Root(F.W,W..B)
Treatments	Inqelab mung(V1)	NIFA-19 (V2)	NIFA-17 (V3)	Sona Mung (V4)	Ramzan (V5)
T0	2.9	2.78	2.67	2.43	2.38
	2.81	2.73	2.66	2.48	2.34
	2.88	2.74	2.64	2.49	2.37
T1	2.66	2.58	2.47	2.37	2.27
	2.62	2.59	2.43	2.39	2.29
	2.64	2.54	2.48	2.34	2.24
T2	2.55	2.47	2.38	2.27	2.18
	2.54	2.48	2.39	2.29	2.17
	2.58	2.44	2.34	2.24	2.14
T3	2.49	2.38	2.27	2.17	2.07
	2.48	2.37	2.28	2.18	2.04
	2.44	2.31	2.24	2.14	2.09
T4	2.38	2.28	2.19	2.02	1.94
	2.39	2.29	2.18	2.07	1.93
	2.34	2.24	2.14	2.04	1.97
T5	2.28	2.17	2.08	1.98	1.84
	2.27	2.14	2.04	1.94	1.89
	2.24	2.19	2.03	1.93	1.83

## Sheet: M.H Shoot(D.W, W.O.B)
Treatments	Inqelab mung(V1)	NIFA-19 (V2)	NIFA-17 (V3)	Sona Mung (V4)	Ramzan (V5)
T0	3.89	3.21	2.77	2.34	1.91
	3.91	3.09	2.84	2.12	1.83
	3.78	3.01	2.71	2.06	2.01
T1	3.34	2.85	2.13	1.93	1.23
	3.21	2.71	2.26	1.84	1.14
	3.15	2.67	2.05	1.69	1.11
T2	2.87	2.21	1.94	1.23	0.92
	3.02	2.15	1.83	1.12	0.85
	2.94	2.03	1.75	1.11	0.81
T3	2.51	1.67	1.12	1.03	0.72
	2.31	1.83	1.09	0.91	0.65
	2.17	1.76	1.01	0.84	0.6
T4	1.72	1.21	0.83	0.71	0.45
	1.71	1.11	0.71	0.64	0.51
	1.82	1.04	0.67	0.56	0.38
T5	1.12	0.83	0.39	0.21	0.04
	1.01	0.71	0.38	0.16	0.098
	0.92	0.61	0.28	0.07	0.092

## Sheet: M.H Shoot(D.W, W.B)
Treatments	Inqelab mung(V1)	NIFA-19 (V2)	NIFA-17 (V3)	Sona Mung (V4)	Ramzan (V5)
T0B	5.48	5.25	5.02	4.67	4.03
	5.33	5.21	4.86	4.43	3.91
	5.31	5.16	4.78	4.38	3.82
T1B	5.21	5.12	4.61	4.13	3.32
	5.17	5.06	4.56	4.07	3.14
	5.11	5.01	4.44	3.91	3.27
T2B	5.03	4.83	4.32	3.55	3.06
	4.91	4.73	4.26	3.76	2.91
	4.83	4.78	4.21	3.63	2.84
T3B	4.81	4.52	4.14	3.02	2.78
	4.74	4.45	4.05	2.92	2.63
	4.68	4.36	3.96	2.81	2.55
T4B	4.61	4.13	3.66	2.12	2.17
	4.56	4.07	3.86	2.34	2.05
	4.47	4.28	3.73	2.21	1.96
T5B	4.42	3.92	3.61	2.07	1.86
	4.36	3.84	3.57	1.78	1.74
	4.3	3.74	3.42	1.83	1.61

[truncated: 40 more sheets: M.H Root(D.W, W.O.B), M.H Root(D.W,W.B), M.Harvest(No.R.Nodule,Plant), M.Harvest(No.R.Nodule, B Plant), F.Harvest(Shoot Length,W.O.B), F.Harvest(Shoot Length,W.B), F.Harvest(Root Length,W.O.B), F.Harvest(Root Length, W.B), F.H(F.Weigh Shoot,W.O.B), F.H(F.Weigh Shoot,W.B), F.H(F.Weigh Root,W.O.B), F.H(F.Weigh Root,W.B), F.H(D.Weigh Shoot,W.O.B), F.H(D.Weigh Shoot,W.B), F.H(D.Weigh Root,W.O.B), F.H(D.Weigh Root,W.B), F.H(R.Nodul,W.O.B), F.H(R.Nodul,W.B), F.H(No.Pods per Plant),W.O.B, F.H(No.Pods per Plant),W.B …]
